# Supplementary material for: A Paradigm Shift in Islamic Finance Industry: Value Based Intermediation, Human Development, Ecological Footprint, and Social Impact Financing
Source: Preprints.org preprint supplement (doi:10.20944/preprints202408.1243.v1), 2024-08-16
Supplement: Supplementary file 1 [file supplementary]

**Shah Fahad**

[**fahad.shah@std.izu.edu.tr**](mailto:fahad.shah@std.izu.edu.tr)

**PhD candidate at Istanbul Sabahattin Zaim University**

**PhD candidate**

I have studied BSc (Honors) in Islamic Economics from the International Institute of Islamic Economics (**IIIE**), Islamabad (**IIUI**). I did my MS/MPhil in Islamic Banking and Finance from the University of Management and Technology (**UMT**), Lahore, and now pursuing a Ph.D. in Islamic Economics and Finance from **Istanbul Sabahattin Zaim University (IZU)**, Turkey (Thesis final monitoring stage). My research area is Islamic Fintech, Cryptocurrencies, Central Bank digital currencies (CBDCs), Digital transformation of the value-based intermediation, financial structure transformation, and the economic and finance paradigm shift from the Islamic finance perspective. I have presented scientific research papers at international conferences and seminars around the globe.

Google scholar profile <https://scholar.google.com/citations?user=64cpEWkAAAAJ&hl=en>

**Professor Dr. Mehmet BULUT**

**Professor Mehmet BULUT**

[**mehmet.bulut@izu.edu.tr**](mailto:mehmet.bulut@izu.edu.tr)

**Professor at Istanbul Sabahattin Zaim University**

Faculty member at Istanbul Sabahattin Zaim University.

Former rector Istanbul Sabahattin Zaim University.

Board member TUBITAK (Turkish Scientific and technological Research Council)

Chairman of the Board of trustees ADAM VAKFI

Chairman HEM group IZU incubation center.

Member Turkish Academy of Science

He became the President to Istanbul Sabahattin Zaim University in 2013 and served more than 8 years (two terms). During his time Istanbul Sabahattin Zaim University was awarded by European Group as the best education in the world on Islamic Economics and Finance. He was also elected to the Turkish Academy of Science (TUBA) in 2012. He is currently the Board Member of Scientific and Technological Research Counsel of Turkey (TUBITAK) and the Chairperson of Working Group on Sustainable Development and Finance at TUBA.

As a visiting scholar he has been to Sweden/Dalarna, England/Cambridge and United States of America/Harvard and Princeton Universities. His Turkish and English books have been published by various publishing houses locally and abroad. His articles have been published on various international academic journals such as American Journal of Economics and Sociology (AJES-New York), Journal of Economic and Social History of Orient (JESHO-Leiden), Journal of European Economic History (JEEH-

Roma) and Middle Eastern Studies (MES-London). He is Editor in Chief for Journal of Social Sciences
